# Supplementary material
Source: HighWire-hosted journal article supplement (https://bjsm.bmj.com/content/57/20/1327)
Supplement: inline-supplementary-material-4 [file inline-supplementary-material-4.pdf]

**SF4: Search strategies for each source**

|                          |                                                                                                                                                                                                                                                                                                                                                                                                                                                                                                                                                                                |
|--------------------------|--------------------------------------------------------------------------------------------------------------------------------------------------------------------------------------------------------------------------------------------------------------------------------------------------------------------------------------------------------------------------------------------------------------------------------------------------------------------------------------------------------------------------------------------------------------------------------|
| Embase (Ovid)            | (exercise OR exercise*.mp OR “isometric exercise” OR kinesiotherapy OR Eccentric.mp OR concentric.mp OR “heavy slow resistance”.mp OR “isokinetic exercise” OR plyometrics OR “muscle stretching” OR “muscle training”) AND (tendinitis OR Tendinopathy.mp OR “tendon injury” OR “shoulder injury” OR “rotator cuff injury” OR “tennis elbow” OR tendin.mp OR tendon.mp OR bursitis OR “shoulder impingement syndrome” OR “posterior tibial tendon dysfunction” OR “Greater trochanteric pain syndrome”.mp)                                                                    |
| CINAHL (EBSCO-host)      | (MH Exercise OR AB exercise* OR MH “muscle strengthening” OR MH “rehabilitation” OR MH “eccentric contraction” OR TX “heavy slow resistance exercis*” OR AB eccentric OR AB concentric OR AB isokinetic OR MH “therapeutic exercise”) AND (MH tendinopathy OR MH “arm injuries” OR “tendon injuries” OR MH tendons OR TX tendin* OR TX tendon* OR AB bursitis OR MH Bursitis OR MH “Posterior tibial tendon dysfunction” OR MH “shoulder impingement syndrome” OR AB “Greater trochanteric pain syndrome”)                                                                     |
| Medline (EBSCO-host)     | (MH exercise OR AB exercise* OR MH “isometric contraction” OR MH rehabilitation OR TX eccentric OR TX concentric OR TX “heavy slow resistance” OR TX isokinetic) AND (MH tendinopathy OR MH “shoulder injuries” OR MH tendons OR MH “tendon injuries OR TX tendin* OR tendon* OR MH bursitis OR AB bursitis OR MH “posterior tibial tendon dysfunction” OR MH “shoulder impingement syndrome” OR AB “greater trochanteric pain syndrome”)                                                                                                                                      |
| SPORTDiscus (EBSCO-host) | (DE exercise OR DE “exercise therapy” OR AB exercise* OR TX eccentric OR TX concentric OR TX “heavy slow resistance” OR DE “isokinetic exercise” OR DE plyometrics OR DE “strength training” OR DE “stretch (physiology)” OR DE “isometric exercise” OR DE rehabilitation) AND (DE tendinitis OR DE tendinosis OR AB tendinopathy OR DE “tendon injuries” OR “shoulder injuries” OR DE “tennis elbow” OR AB tendin* OR AB tendon* OR DE bursitis OR AB “shoulder impingement syndrome” OR AB “posterior tibial tendon dysfunction” OR AB “greater trochanteric pain syndrome”) |
| Amed (EBSCO-host)        | (ZU exercise OR ZU “exercise therapy” OR AB exercise OR ZU “muscle stretching exercises” OR ZU “isometric contraction” OR ZU rehabilitation OR TZ eccentric OR TZ concentric OR TX “heavy slow resistance” OR TX isokinetic OR AB plyometric) AND (ZU tendinopathy OR ZU “tendon injuries” OR ZU tendons OR ZU “shoulder injuries” OR ZU “tennis elbow” OR TX tendin* OR TX tendon* OR ZU bursitis OR AB bursitis OR ZU “shoulder impingement syndrome” OR ZU “posterior tibial tendon dysfunction” OR AB “greater trochanteric pain syndrome”)                                |
| JB1 Evidence Synthesis   | Tendinopathy AND exercise                                                                                                                                                                                                                                                                                                                                                                                                                                                                                                                                                      |
| Cochrane Library         | Tendinopathy AND exercise                                                                                                                                                                                                                                                                                                                                                                                                                                                                                                                                                      |

|                    |                                                                          |
|--------------------|--------------------------------------------------------------------------|
|                    | Tendin* AND exercise<br>Tendon AND exercise                              |
| PEDro              | Tendinopathy AND exercise<br>Tendin* AND exercise<br>Tendon AND exercise |
| Epistemonikos      | (tendinopathy OR tendon* OR tendin*) AND exercise                        |
| Clinicaltrials.gov | Tendinopathy AND exercise<br>Tendin* AND exercise<br>Tendon AND exercise |
| ISRCTN             | Tendinopathy AND exercise<br>Tendin* AND exercise<br>Tendon AND exercise |
| EU CTR             | Tendinopathy AND exercise<br>Tendin* AND exercise<br>Tendon AND exercise |
| ANZCTR             | Tendinopathy AND exercise<br>Tendin* AND exercise<br>Tendon AND exercise |

ISRCTN – the Research Registry; EU CTN – European Clinical Trials Registry; ANZCTR – Australia and New Zealand Clinical Trials Registry.
