# Supplementary material
Source: HighWire-hosted journal article supplement (https://bjsm.bmj.com/content/57/20/1327)
Supplement: inline-supplementary-material-9 [file inline-supplementary-material-9.pdf]

**SF9: Moderator analyses comparing averaged pooled effect sizes**

Supplementary table 9A. Moderator analysis comparing average pooled effect size for body weight interventions versus interventions including additional external load. Results presented across all tendinopathies and individual tendinopathies.

| Moderator                                     |                                                            | Pooled SMD <sub>pre</sub><br>estimate<br>[95% CrI] | Probability                                            | Study<br>VPC<br>[75% CrI] | Outcome VPC<br>[75% CrI] | Measurement<br>occasion VPC<br>[75% CrI] | Confidence in<br>evidence |
|-----------------------------------------------|------------------------------------------------------------|----------------------------------------------------|--------------------------------------------------------|---------------------------|--------------------------|------------------------------------------|---------------------------|
| <b>Large Effects<br/>(All tendinopathies)</b> | Body mass<br>169 outcomes<br>28 treatment arms)            | 0.91 [0.58 to 1.2]                                 | $p(\text{Body weight} < \text{Additional})$<br>= 0.998 | 0.78 [0.74 to 0.84]       | 0.18 [0.14 to 0.23]      | 0.02 [0.00 to 0.06]                      | Low                       |
|                                               | Additional external<br>(544 outcomes<br>90 treatment arms) | 1.4 [1.2 to 1.6]                                   |                                                        |                           |                          |                                          | Moderate                  |
| <b>Large Effects<br/>(Achilles)</b>           | Body weight<br>(91 outcomes<br>14 treatment arms)          | 0.87 [0.43 to 1.2]                                 | $p(\text{Body weight} < \text{Additional})$<br>= 0.979 | 0.85 [0.75 to 0.92]       | 0.10 [0.04 to 0.19]      | 0.05 [0.00 to 0.10]                      | Low                       |
|                                               | Additional external<br>(84 outcomes<br>21 treatment arms)  | 1.4 [1.1 to 1.8]                                   |                                                        |                           |                          |                                          | Low                       |
| <b>Large Effects<br/>(RCRSP)</b>              | Body weight<br>(60 outcomes<br>7 treatment arms)           | 0.60 [0.22 to 0.89]                                | $p(\text{Body weight} < \text{Additional})$<br>= 0.990 | 0.35 [0.22 to 0.50]       | 0.57 [0.44 to 0.71]      | 0.05 [0.01 to 0.11]                      | Low                       |
|                                               | Additional external<br>(216 outcomes<br>32 treatment arms) | 1.0 [0.84 to 1.2]                                  |                                                        |                           |                          |                                          | Moderate                  |
| <b>Large Effects<br/>(Patellar)</b>           | Body weight<br>(10 outcomes<br>3 treatment arms)           | 0.76 [0.40 to 0.97]                                | $p(\text{Body weight} < \text{Additional})$<br>= 0.903 | 0.48 [0.21 to 0.68]       | 0.45 [0.26 to 0.72]      | 0.06 [0.00 to 0.14]                      | Very Low                  |
|                                               | Additional external<br>(93 outcomes<br>18 treatment arms)  | 1.1 [0.88 to 1.4]                                  |                                                        |                           |                          |                                          | Low                       |
| <b>Small Effects (All<br/>tendinopathies)</b> | Body weight<br>(96 outcomes<br>11 treatment arms)          | 0.40 [0.21 to 0.53]                                | $p(\text{Body weight} < \text{Additional})$<br>= 0.619 | 0.70 [0.63 to 0.77]       | 0.27 [0.20 to 0.34]      | 0.02 [0.00 to 0.05]                      | Low                       |

|                                     |                                                            |                      |                                                        |                     |                     |                     |          |
|-------------------------------------|------------------------------------------------------------|----------------------|--------------------------------------------------------|---------------------|---------------------|---------------------|----------|
|                                     | Additional external<br>(331 outcomes<br>49 treatment arms) | 0.44 [0.33 to 0.55]  |                                                        |                     |                     |                     | Moderate |
| <b>Small Effects<br/>(Achilles)</b> | Body weight<br>(71 outcomes<br>6 treatment arms)           | 0.36 [-0.17 to 0.92] | $p(\text{Body weight} < \text{Additional})$<br>= 0.721 | 0.53 [0.34 to 0.71] | 0.47 [0.29 to 0.65] | 0.00 [0.00 to 0.02] | Very Low |
|                                     | Additional external<br>(51 outcomes<br>8 treatment arms)   | 0.56 [0.07 to 1.0]   |                                                        |                     |                     |                     | Very Low |
| <b>Small Effects<br/>(RCRSP)</b>    | Body weight<br>(12 outcomes<br>2 treatment arms)           | 0.48 [0.13 to 0.84]  | $p(\text{Body weight} < \text{Additional})$<br>= 0.520 | 0.76 [0.63 to 0.86] | 0.22 [0.13 to 0.35] | 0.00 [0.00 to 0.01] | Very Low |
|                                     | Additional external<br>(181 outcomes<br>21 treatment arms) | 0.48 [0.36 to 0.60]  |                                                        |                     |                     |                     | Moderate |

Large Effects: Effect sizes obtained from outcomes measuring: 1) Disability; 2) Pain on loading/activity; 3) Pain without further specification; 4) Function; and 5) Pain over a specified time. Small Effects: Effect sizes obtained from outcomes measuring: 1) Quality of Life; 2) Physical Functional Capacity. CrI= credible interval. VPC= variance partition coefficient. RCRSP= rotator cuff related shoulder pain.

Supplementary table 9B. Moderator analysis comparing average pooled effect size for different training frequencies. Results presented across all tendinopathies and individual tendinopathies.

| Moderator                             |                                                               | Pooled SMD <sub>pre</sub><br>estimate<br>[95% CrI] | Probability                                                         | Study<br>VPC<br>[75% CrI] | Outcome VPC<br>[75% CrI] | Measurement<br>occasion VPC<br>[75% CrI] | Confidence in<br>evidence |
|---------------------------------------|---------------------------------------------------------------|----------------------------------------------------|---------------------------------------------------------------------|---------------------------|--------------------------|------------------------------------------|---------------------------|
| Large Effects<br>(All tendinopathies) | Less than daily<br>(270 outcomes<br>45 treatment arms)        | 1.5 [1.3 to 1.7]                                   | $p(\text{Less than daily} > \text{Once per day}) = 0.992$           | 0.77 [0.71 to 0.82]       | 0.19 [0.15 to 0.24]      | 0.04 [0.00 to 0.08]                      | Low                       |
|                                       | Once per day<br>(192 outcomes<br>33 treatment arms)           | 1.0 [0.69 to 1.3]                                  | $p(\text{Once per day} < \text{More than once per day}) = 0.693$    |                           |                          |                                          | Moderate                  |
|                                       | More than once per day<br>(305 outcomes<br>51 treatment arms) | 1.2 [1.0 to 1.4]                                   | $p(\text{Less than daily} > \text{More than once per day}) = 0.951$ |                           |                          |                                          | Moderate                  |
| Large Effects<br>(Achilles)           | Less than daily<br>10 outcomes<br>3 treatment arms)           | 2.2 [1.2 to 3.4]                                   | $p(\text{Less than daily} > \text{Once per day}) = 0.989$           | 0.85 [0.75 to 0.92]       | 0.10 [0.05 to 0.18]      | 0.04 [0.00 to 0.11]                      | Very low                  |
|                                       | Once per day<br>(40 outcomes<br>10 treatment arms)            | 1.0 [0.51 to 1.5]                                  | $p(\text{Once per day} < \text{More than once per day}) = 0.712$    |                           |                          |                                          | Low                       |
|                                       | More than once per day<br>(133 outcomes<br>24 treatment arms) | 1.2 [0.86 to 1.5]                                  | $p(\text{Less than daily} > \text{More than once per day}) = 0.976$ |                           |                          |                                          | Moderate                  |
| Large Effects<br>(RCRSP)              | Less than daily<br>(121 outcomes<br>18 treatment arms)        | 1.0 [0.72 to 1.4]                                  | $p(\text{Less than daily} > \text{Once per day}) = 0.815$           | 0.42 [0.28 to 0.56]       | 0.49 [0.36 to 0.63]      | 0.09 [0.01 to 0.17]                      | Moderate                  |
|                                       | Once per day<br>(76 outcomes<br>11 treatment arms)            | 0.78 [0.42 to 1.1]                                 | $p(\text{Once per day} < \text{More than once per day}) = 0.986$    |                           |                          |                                          | Moderate                  |
|                                       | More than once per day<br>(104 outcomes<br>13 treatment arms) | 1.4 [0.97 to 1.7]                                  | $p(\text{Less than daily} < \text{More than once per day}) > 0.896$ |                           |                          |                                          | Low                       |
| Small Effects<br>(All tendinopathies) | Less than daily<br>(174 outcomes<br>21 treatment arms)        | 0.60 [0.46 to 0.74]                                | $p(\text{Less than daily} > \text{Once per day}) = 0.999$           | 0.67 [0.58 to 0.74]       | 0.30 [0.23 to 0.39]      | 0.02 [0.00 to 0.06]                      | Moderate                  |
|                                       | Once per day<br>(156 outcomes)                                | 0.28 [0.10 to 0.45]                                | $p(\text{Once per day} < \text{More than once per day}) = 0.802$    |                           |                          |                                          | Moderate                  |

|                                 |                                                               |                      |                                                                     |                     |                     |                     |          |
|---------------------------------|---------------------------------------------------------------|----------------------|---------------------------------------------------------------------|---------------------|---------------------|---------------------|----------|
|                                 | 20 treatment arms)                                            |                      |                                                                     |                     |                     |                     |          |
|                                 | More than once per day<br>(107 outcomes<br>19 treatment arms) | 0.39 [0.22 to 0.53]  | $p(\text{Less than daily} > \text{More than once per day}) = 0.976$ |                     |                     |                     | Low      |
|                                 |                                                               |                      |                                                                     |                     |                     |                     |          |
| <b>Small Effects (Achilles)</b> | Less than daily<br>(26 outcomes<br>2 treatment arms)          | 0.79 [0.20 to 1.4]   | $p(\text{Less than daily} > \text{Once per day}) = 0.997$           |                     |                     |                     | Very low |
|                                 | Once per day<br>(51 outcomes<br>5 treatment arms)             | 0.28 [-0.07 to 0.63] | $p(\text{Once per day} > \text{More than once per day}) = 0.533$    | 0.28 [0.12 to 0.48] | 0.71 [0.51 to 0.87] | 0.00 [0.00 to 0.03] | Low      |
|                                 | More than once per day<br>(46 outcomes<br>8 treatment arms)   | 0.28 [0.01 to 0.60]  | $p(\text{Less than daily} > \text{More than once per day}) = 0.998$ |                     |                     |                     | Moderate |
|                                 |                                                               |                      |                                                                     |                     |                     |                     |          |
| <b>Small Effects (RCRSP)</b>    | Less than daily<br>(105 outcomes<br>14 treatment arms)        | 0.53 [0.37 to 0.68]  | $p(\text{Less than daily} > \text{Once per day}) = 0.948$           |                     |                     |                     | Moderate |
|                                 | Once per day<br>(46 outcomes<br>5 treatment arms)             | 0.27 [0.04 to 0.51]  | $p(\text{Once per day} > \text{More than once per day}) = 0.602$    | 0.62 [0.47 to 0.75] | 0.30 [0.18 to 0.43] | 0.07 [0.00 to 0.17] | Very low |
|                                 | More than once per day<br>(44 outcomes<br>6 treatment arms)   | 0.29 [0.03 to 0.55]  | $p(\text{Less than daily} > \text{More than once per day}) = 0.902$ |                     |                     |                     | Low      |

Large Effects: Effect sizes obtained from outcomes measuring: 1) Disability; 2) Pain on loading/activity; 3) Pain without further specification; 4) Function; and 5) Pain over a specified time. Small Effects: Effect sizes obtained from outcomes measuring: 1) Quality of Life; 2) Physical Functional Capacity. CrI= credible interval. VPC= variance partition coefficient. RCRSP= rotator cuff related shoulder pain.

Supplementary table 9C. Moderator analysis comparing average pooled effect size for binary resistance volume categorisation. Results presented across all tendinopathies and individual tendinopathies.

| Moderator                             |                                                      | Pooled SMD <sub>pre</sub><br>estimate<br>[95% CrI] | Probability                                             | Study<br>VPC<br>[75% CrI] | Outcome VPC<br>[75% CrI] | Measurement<br>occasion VPC<br>[75% CrI] | Confidence in<br>evidence |
|---------------------------------------|------------------------------------------------------|----------------------------------------------------|---------------------------------------------------------|---------------------------|--------------------------|------------------------------------------|---------------------------|
| Large Effects<br>(All tendinopathies) | Lower Volume<br>(377 outcomes<br>63 treatment arms)  | 1.2 [0.95 to 1.3]                                  | $p(\text{Higher volume} < \text{Lower volume}) = 0.553$ | 0.80 [0.74 to 0.85]       | 0.17 [0.13 to 0.21]      | 0.03 [0.00 to 0.07]                      | Moderate                  |
|                                       | Higher Volume<br>(355 outcomes<br>60 treatment arms) | 1.2 [0.95 to 1.3]                                  |                                                         |                           |                          |                                          | Moderate                  |
| Large Effects<br>(Achilles)           | Lower Volume<br>(29 outcomes<br>3 treatment arms)    | 1.1 [0.15 to 2.1]                                  | $p(\text{Higher volume} > \text{Lower volume}) = 0.601$ | 0.85 [0.73 to 0.92]       | 0.10 [0.04 to 0.20]      | 0.04 [0.00 to 0.11]                      | Low                       |
|                                       | Higher Volume<br>(142 outcomes<br>32 treatment arms) | 1.2 [0.93 to 1.6]                                  |                                                         |                           |                          |                                          | Moderate                  |
| Large Effects<br>(RCRSP)              | Lower Volume<br>(220 outcomes<br>33 treatment arms)  | 0.97 [0.76 to 1.2]                                 | $p(\text{Higher volume} > \text{Lower volume}) = 0.989$ | 0.44 [0.32 to 0.57]       | 0.45 [0.34 to 0.58]      | 0.10 [0.01 to 0.18]                      | Moderate                  |
|                                       | Higher Volume<br>(75 outcomes<br>7 treatment arms)   | 1.5 [1.1 to 1.9]                                   |                                                         |                           |                          |                                          | Moderate                  |
| Large Effects<br>(Patellar)           | Lower Volume<br>(62 outcomes<br>11 treatment arms)   | 1.0 [0.62 to 1.4]                                  | $p(\text{Higher volume} > \text{Lower volume}) = 0.54$  | 0.68 [0.46 to 0.82]       | 0.29 [0.14 to 0.49]      | 0.03 [0.00 to 0.09]                      | Low                       |
|                                       | Higher Volume<br>(47 outcomes<br>12 treatment arms)  | 1.0 [0.66 to 1.4]                                  |                                                         |                           |                          |                                          | Low                       |
| Large Effects<br>(Lateral elbow)      | Lower Volume<br>(63 outcomes<br>13 treatment arms)   | 1.7 [0.70 to 2.5]                                  | $p(\text{Higher volume} < \text{Lower volume}) = 0.612$ | 0.73 [0.57 to 0.84]       | 0.24 [0.14 to 0.39]      | 0.02 [0.00 to 0.04]                      | Low                       |
|                                       | Higher Volume<br>(91 outcomes<br>10 treatment arms)  | 1.6 [0.62 to 2.5]                                  |                                                         |                           |                          |                                          | Low                       |
|                                       | Lower Volume                                         | 0.56 [0.37 to 0.74]                                |                                                         | 0.71 [0.63 to 0.78]       | 0.27 [0.20 to 0.35]      | 0.02 [0.00 to 0.05]                      | Moderate                  |

|                                           |                                                      |                     |                                                         |                     |                     |                     |          |
|-------------------------------------------|------------------------------------------------------|---------------------|---------------------------------------------------------|---------------------|---------------------|---------------------|----------|
| <b>Small Effects (All tendinopathies)</b> | (224 outcomes<br>34 treatment arms)                  |                     | $p(\text{Higher volume} < \text{Lower volume}) = 0.782$ |                     |                     |                     |          |
|                                           | Higher Volume<br>(183 outcomes<br>25 treatment arms) | 0.42 [0.26 to 0.59] |                                                         |                     |                     |                     |          |
| <b>Small Effects (RCRSP)</b>              | Lower Volume<br>(165 outcomes<br>19 treatment arms)  | 0.47 [0.33 to 0.61] | $p(\text{Higher volume} > \text{Lower volume}) = 0.792$ | 0.75 [0.60 to 0.86] | 0.23 [0.13 to 0.37] | 0.01 [0.00 to 0.03] | Moderate |
|                                           | Higher Volume<br>(20 outcomes<br>3 treatment arms)   | 0.61 [0.28 to 0.96] |                                                         |                     |                     |                     | Low      |
| <b>Small Effects (Lateral elbow)</b>      | Lower Volume<br>(18 outcomes<br>8 treatment arms)    | 0.45 [0.05 to 0.82] | $p(\text{Higher volume} < \text{Lower volume}) = 0.633$ | 0.53 [0.08 to 0.84] | 0.46 [0.15 to 0.90] | 0.00 [0.00 to 0.02] | Low      |
|                                           | Higher Volume<br>(41 outcomes<br>6 treatment arms)   | 0.38 [0.02 to 0.78] |                                                         |                     |                     |                     | Low      |

Large Effects: Effect sizes obtained from outcomes measuring: 1) Disability; 2) Pain on loading/activity; 3) Pain without further specification; 4) Function; and 5) Pain over a specified time. Small Effects: Effect sizes obtained from outcomes measuring: 1) Quality of Life; 2) Physical Functional Capacity. CrI= credible interval. VPC= variance partition coefficient. RCRSP= rotator cuff related shoulder pain.
